# Supplementary material for: Enhanced electrochemical performance of CTAB-assisted Zn-doped perovskite NiMnO3 nanocrystals on reduced graphene oxide for supercapacitors and oxygen evolution reactions
Source: Royal Society of Chemistry journal article supplement (doi:10.1039/d4ta04617j), 2024-12-14
Supplement: d4ta04617j1.pdf [file d4ta04617j1.pdf]

## Supplementary materials

# Enhanced Electrochemical Performance of CTAB-Assisted Zn-Doped Perovskite NiMnO<sub>3</sub> Nanocrystals on Reduced Graphene Oxide for Supercapacitor and Oxygen Evolution Reactions

*Suprimkumar D. Dhas<sup>1</sup>, Geunchul Kim<sup>1</sup>, Pragati N. Thonge<sup>1,2</sup>, Amar M. Patil<sup>3</sup>, Avinash C.*

*Mendhe<sup>1</sup>, Rabia Batool<sup>1</sup>, Daewon Kim<sup>1\*</sup>*

<sup>1</sup>Department of Electronic Engineering, Institute for Wearable Convergence Electronics, Kyung Hee University, 1732 Deogyong-daero, Giheung-gu, Yongin 17104, Republic of Korea

<sup>2</sup>Department of Botany, Punyashlok Ahilyadevi Holkar, Solapur University, Solapur, Maharashtra 416 004, India

<sup>3</sup>Energy Conversion Engineering Laboratory, Institute of Regional Innovation (IRI), Hirosaki University, Japan

## Experimental Details

### Pretreatment of graphene oxide nanoribbons (GONRs):

Upon receiving the purchased GONRs, begin by dispersing the GONRs in a mixture of 20 mL DIW and 20 mL ethanol, to form a homogeneous suspension. This can be achieved by ultrasonication, where the mixture is subjected to ultrasonic waves for a 2 h to ensure thorough dispersion. After ultrasonication, centrifuge the suspension at a high speed, for about 30 min. This step helps to separate the unexfoliated particles and any aggregates from the exfoliated nanoribbons. Carefully decant the supernatant containing the dispersed GONRs and transfer it to a new container. The next step involves the washing process, which is critical for removing any residual solvents, contaminants, or by-products from the synthesis process. Add a fresh portion of the solvent to the GONRs, followed by repeated ultrasonication and centrifugation, as described previously. This washing step should be repeated at least three times to ensure thorough cleaning. Finally, the purified GONRs can be collected by air-drying the suspension, yielding a powder form of graphene oxide nanoribbons ready for further characterization.

### Calculation Method:

**Mass activity:** The values of mass activity (A/g) are calculated from the catalyst loading density  $m$  and the measured current density  $j$  (mA/cm<sup>2</sup>) at  $\eta_r=0.35V$ . The mass activity can be calculated as follows:

$$\text{Mass activity} = j/m.$$

**Specific activity:** The values of Specific Activity (mA/cm<sup>2</sup>) are calculated from the BET surface area,  $S_{\text{BET}}$  (m<sup>2</sup>/g) and mass activity.

The mass activity can be calculated as follows:

$$\text{Specific activity} = j/(10mS_{\text{BET}}).$$

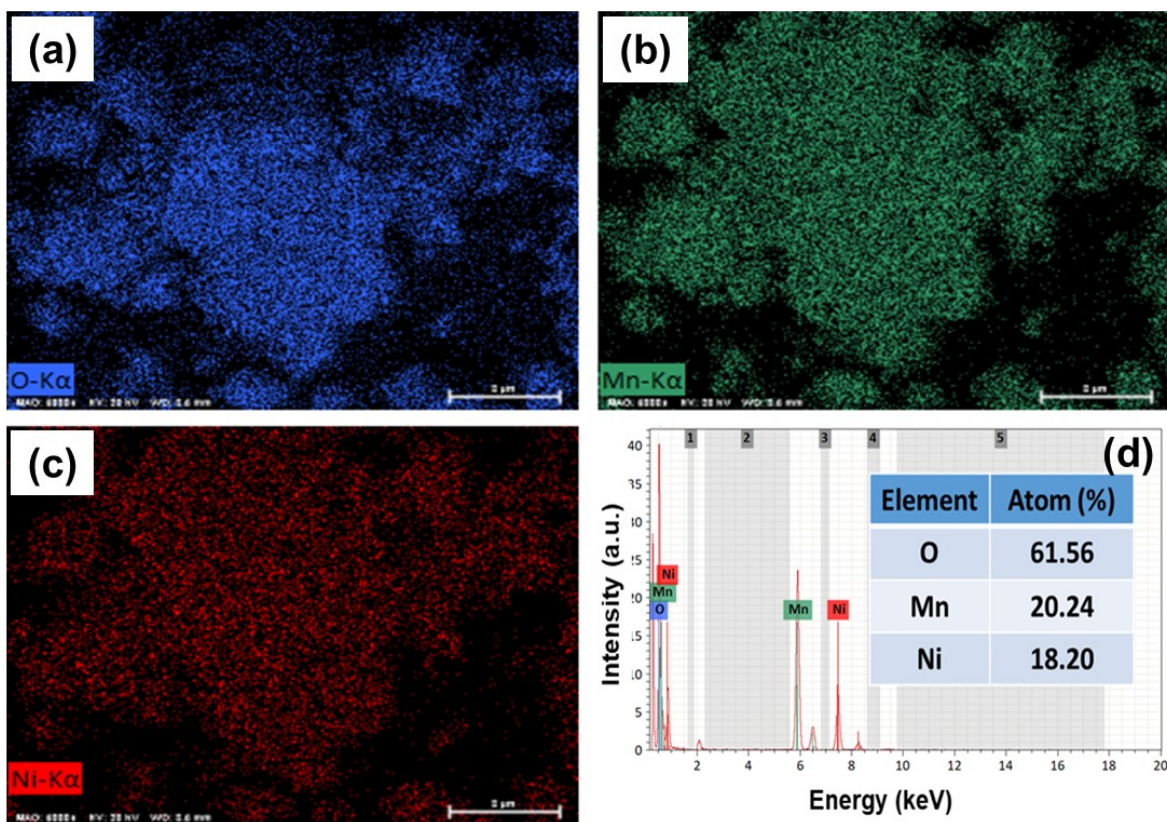

Fig. S1: Element mapping (a) O, (b) Ni, (c) Mn, and corresponding (d) EDS spectra NiMnO<sub>3</sub>

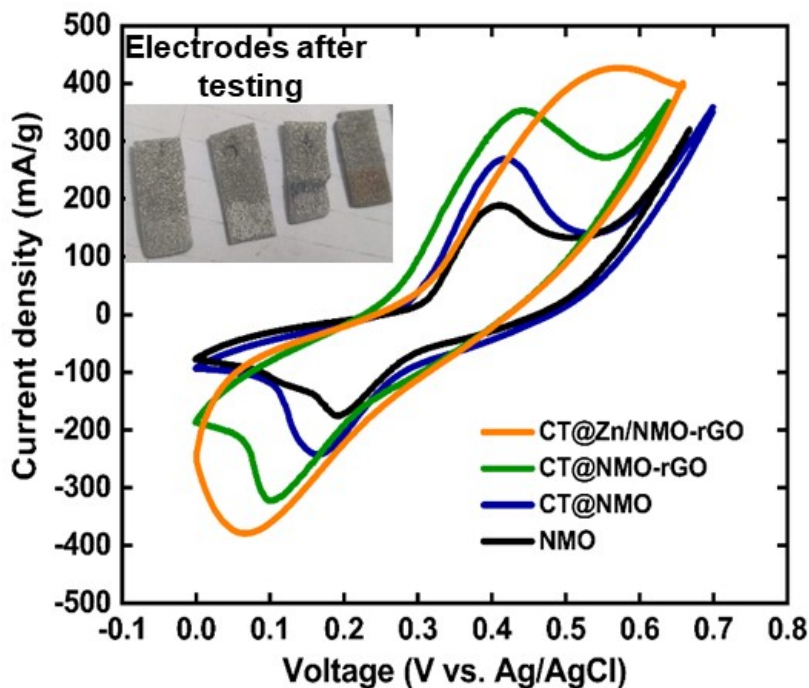

Fig. S2: Comparative CV plot of f NMO based electrodes in 2 M KOH electrolyte (inset actual images of all the electrodes after electrochemical test).

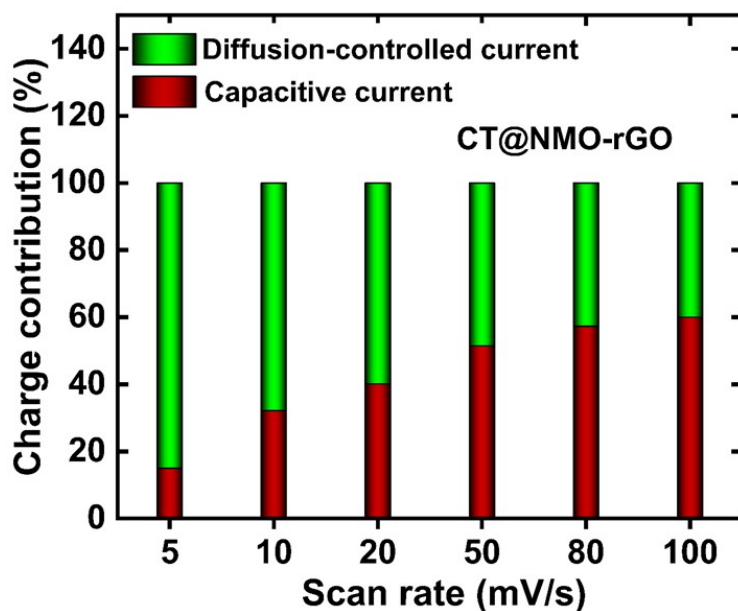

Fig. S3: Capacitive and diffusion-current contributions of CT@NMO-rGO in 2 M KOH electrolyte different scan rates.

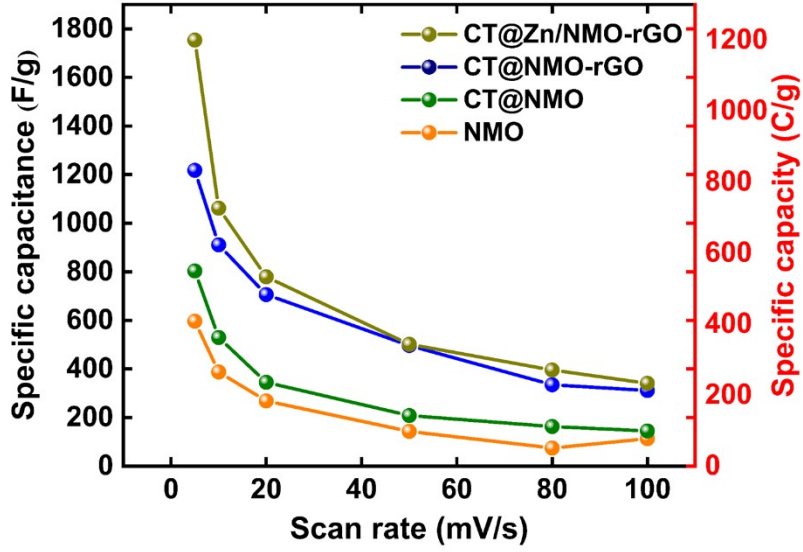

Fig. S4: Plot of specific capacitance/capacity vs scan rate of NMO based electrodes in 2 M KOH electrolyte.

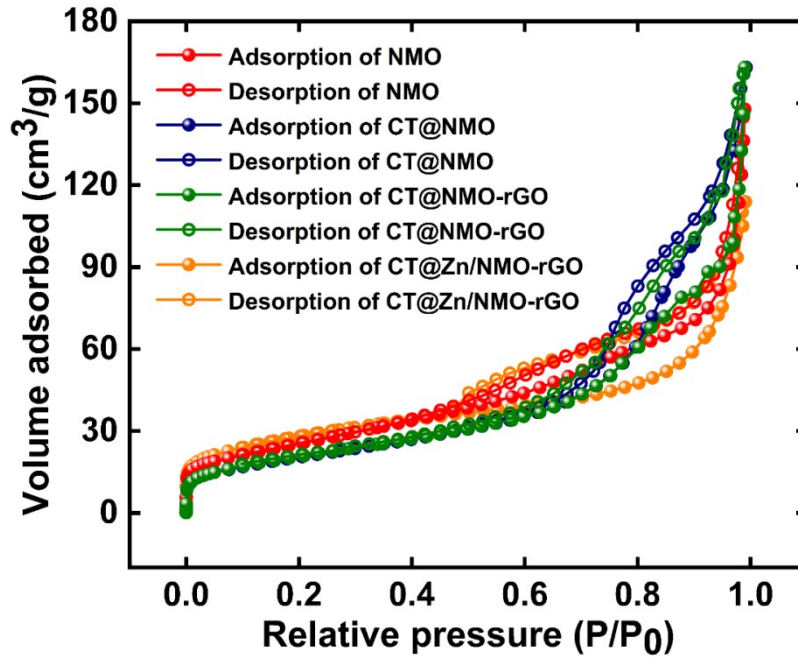

Fig. S5: Comparative  $N_2$  adsorption-desorption plot of NMO based electrodes.

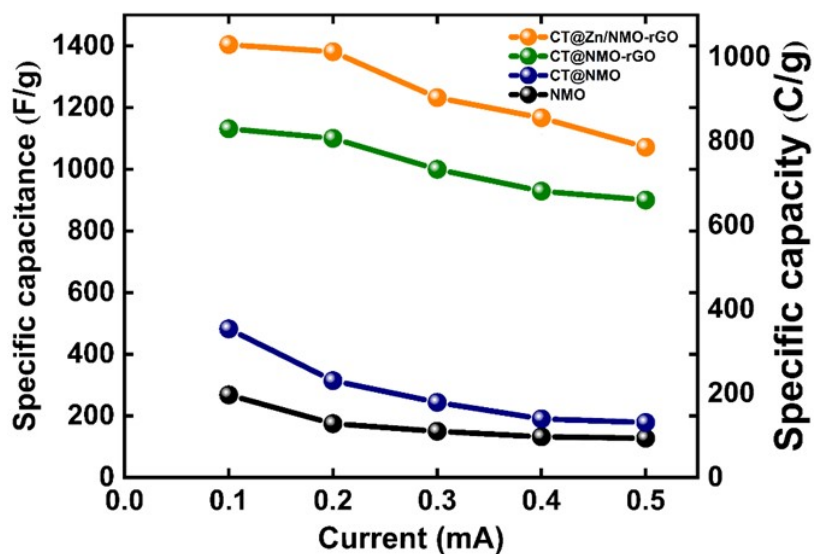

**Fig. S6:** Plot of specific capacitance/capacity vs current density of NMO based electrodes.

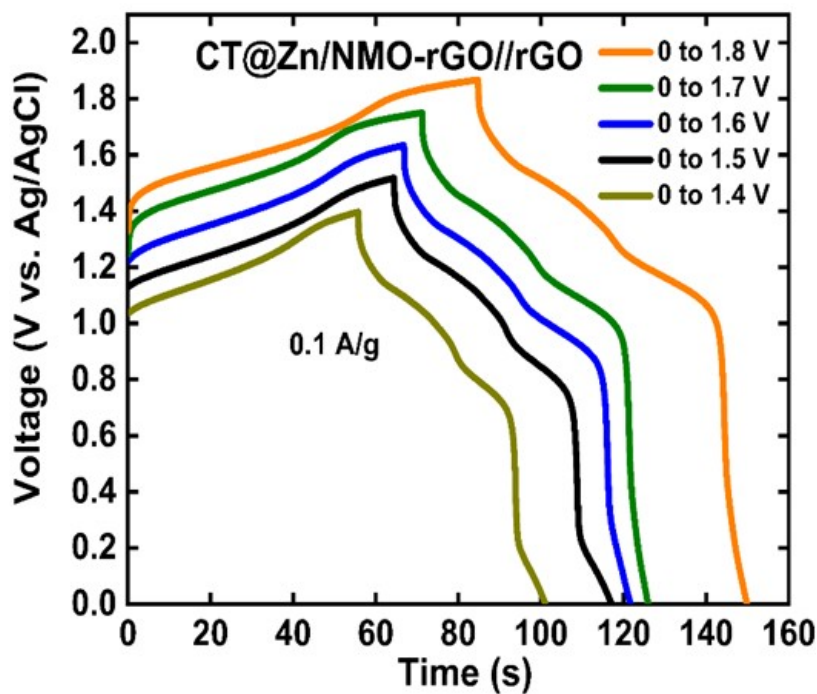

**Fig. S7:** GCD curves of the CT@Zn/NMO-rGO//AC ASSCS recorded at different potential windows at current density of 0.1 A/g in 2 M KOH electrolyte.

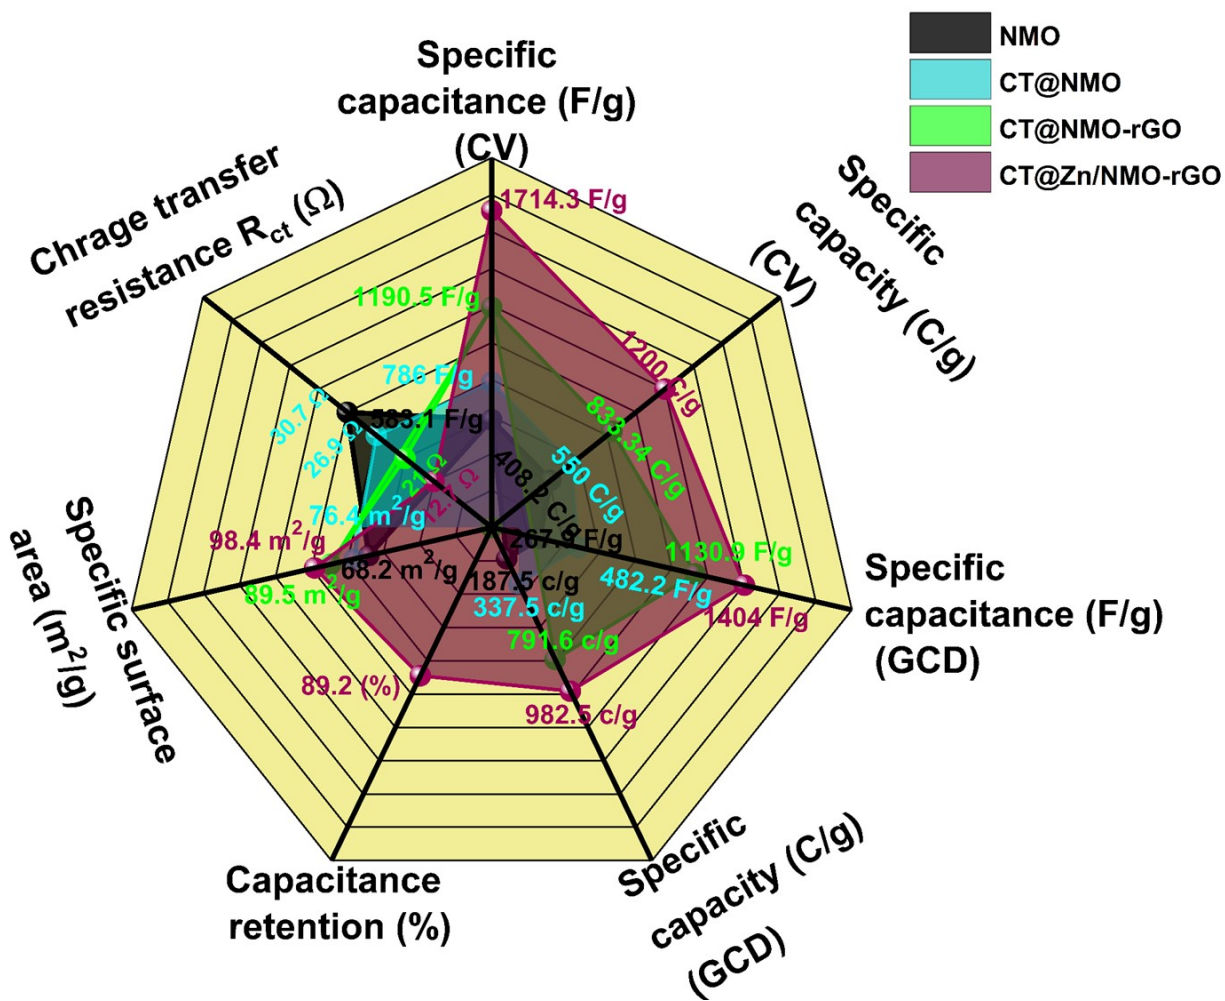

**Fig. S8:** Radar plot comparison of the performance of the pristine NMO, CT@NMO, CT@NMO-rGO and CT@Zn/NMO-rGO electrodes realized.

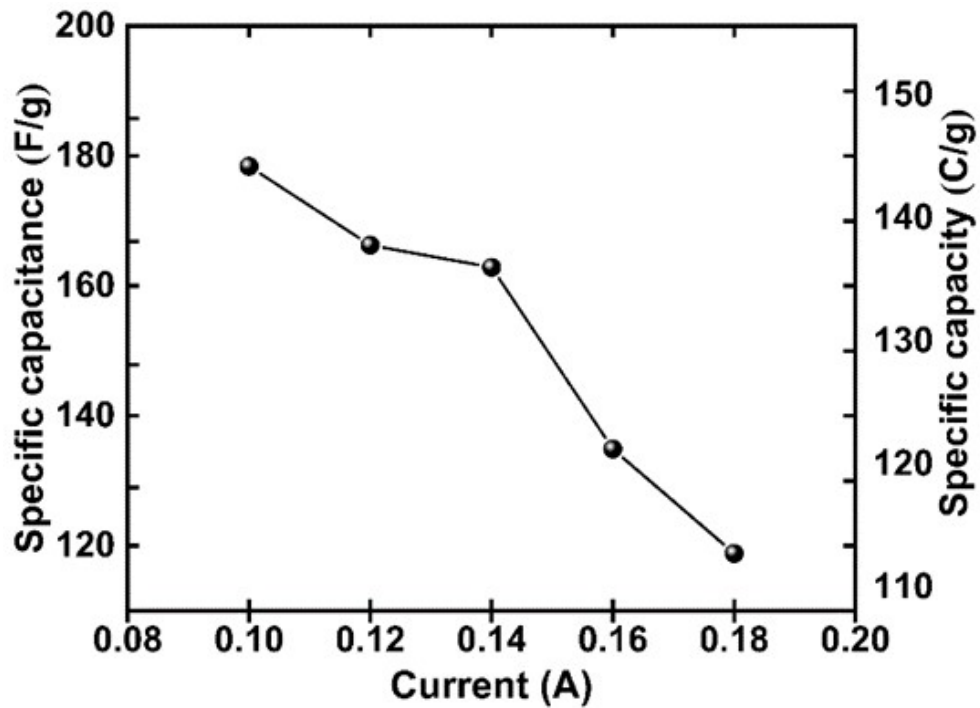

**Fig. S9:** Plot of specific capacitance/capacity verses current density of CT@Zn/NMO-rGO//AC ASSCS.

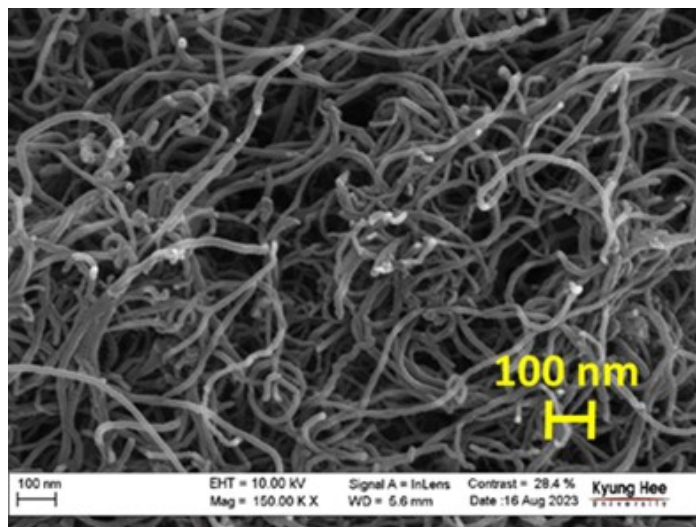

**Fig. S10:** FE-SEM micrograph of graphene oxide nanoribbon



| Sr. No. | Catalyst         | Loading density (mg/cm <sup>2</sup> ) | Overpotential ( $\eta$ ) (mV) @10 mA/cm <sup>2</sup> | Tafel slope (mV/dec) | Mass activity @ $\eta = 0.35$ V (A/g) | S <sub>BET</sub> (m <sup>2</sup> /g) | Specific activity @ $\eta = 0.35$ V (mA/cm <sup>2</sup> ) |
|---------|------------------|---------------------------------------|------------------------------------------------------|----------------------|---------------------------------------|--------------------------------------|-----------------------------------------------------------|
| 1.      | NMO              | 6.1                                   | 465.2                                                | 327.3                | 0.4                                   | 68.2                                 | 0.005                                                     |
| 2.      | CT@NMO           | 6.3                                   | 407.1                                                | 324.7                | 0.8                                   | 76.4                                 | 0.008                                                     |
| 3.      | CT@NMO-rGO       | 6.4                                   | 352                                                  | 303.1                | 1.7                                   | 89.5                                 | 0.011                                                     |
| 4.      | RuO <sub>2</sub> | 8.1                                   | 348.4                                                | 268.8                | 1.72                                  | -                                    | -                                                         |
| 5.      | CT@Zn/NMO-rGO    | 9.8                                   | 296                                                  | 144.4                | 2.54                                  | 98.4                                 | 0.016                                                     |
| 6.      | NF               | -                                     | 549.3                                                | 544.5                | -                                     | -                                    | -                                                         |

**Table S1:** Comparison of OER activity data for NMO-based Catalysts.

| Sr. No. | Material                                                   | Synthesis Method                 | Morphology                  | Current collector | Electrolyte                         | Specific capacitance Cs (F/g) | Retention % After Cycles | Ref.      |
|---------|------------------------------------------------------------|----------------------------------|-----------------------------|-------------------|-------------------------------------|-------------------------------|--------------------------|-----------|
| 1.      | Ni <sub>1-x</sub> Mg <sub>x</sub> MnO <sub>3</sub>         | Chemical co-precipitation route. | Micro-clusters              | NF                | 6 M KOH                             | 527                           | 89.3/1000                | [1]       |
| 2.      | NiMnO <sub>3</sub> -rGO-Co <sub>3</sub> O <sub>4</sub> /NF | Hydrothermal                     | Nanoflakes                  | NF                | 2 M KOH                             | 3.9 F/cm <sup>2</sup>         | 95.5/5000                | [2]       |
| 3.      | NiMnO <sub>3</sub>                                         | Hydrothermal                     | Nano-clusters               | NF                | 1 M KOH                             | 435                           | 98.1/2000                | [3]       |
| 4.      | NiMnO <sub>3</sub>                                         | Hydrothermal                     | Nanocube                    | NF                | 6 M KOH                             | 99.03                         | 77/7000                  | [4]       |
| 5.      | Fe-doped-NiMnO <sub>3</sub>                                | Microwave-assisted hydrothermal  | Nanoflower                  | NF                | 6 mol/L KOH                         | 732.7                         | 78.3/10000               | [5]       |
| 6.      | NiMnO <sub>3</sub>                                         | Hydrothermal                     | Polycrystalline             | Carbon cloth      | 1 M KOH                             | 230                           | 67/2000                  | [6]       |
| 7.      | NiMnO <sub>3</sub>                                         | Microwave-assisted hydrothermal  | flower-like nanoballs       | NF                | 6 mol/L KOH                         | 345.8                         | 92/10000                 | [7]       |
| 8.      | NiMnO <sub>3</sub>                                         | Electrospinning                  | Nanosheets                  | NF                | 1 M KOH                             | 290                           | 88.6/1000                | [8]       |
| 9.      | NG-NiMnO <sub>3</sub>                                      | Hydrothermal                     | Rhombohedral                | NF                | 1 M Na <sub>2</sub> SO <sub>4</sub> | 875                           | 88.5/5000                | [9]       |
| 10.     | NiMnO <sub>3</sub> -rGO                                    | Hydrothermal                     | Nano-fiber                  | Cotton-Cu         | 1 M KOH                             | 404.4 mF/cm <sup>2</sup>      |                          | [10]      |
| 11.     | Ni <sub>6</sub> MnO <sub>8</sub> / NiMnO <sub>3</sub>      | Solvothermal                     | spheres                     | NF                | 6 mol/L KOH                         | 291.9                         | 83.4/5000                | [11]      |
| 12.     | NiMnO <sub>3</sub> /Ni <sub>6</sub> MnO <sub>8</sub>       | Solvothermal-hydrothermal        | nanoblocks@nanoballs        | NF                | 6 M KOH                             | 494.4                         | 88/5000                  | [12]      |
| 13.     | Ni/NiMnO <sub>3</sub> /MnO <sub>2</sub> @NiMn              | Green synthesis                  | Nanoflakes                  | NiMn substrate    | 1 M KOH                             | 2700 F/cm <sup>3</sup>        |                          | [13]      |
| 14.     | NiMnO <sub>3</sub> @NiO                                    | Electrodeposition@Hydrothermal   | Nanospheres@nanospheres     | carbon fiber      | 4 M KOH                             | 1090                          | 89.6/5000                | [14]      |
| 15.     | NiMnO <sub>3</sub>                                         | Electrodeposition                | Nanospheres                 | carbon fiber      | 4 M KOH                             | 752                           | 84.2/5000                | [14]      |
| 16.     | NiMnO <sub>3</sub> /NiMn <sub>2</sub> O <sub>4</sub>       | sol-gel                          | Nano-cotton                 | NF                | 3 M KOH                             | 869                           |                          | [15]      |
| 17.     | NiMnO <sub>3</sub> /NiMn <sub>2</sub> O <sub>4</sub> /CNT  | Sol-gel auto combustion          | Agglomeration-nanoparticled | NF                | 3 M KOH                             | 1347                          | 67/1000                  | [15]      |
| 18.     | NiMnO <sub>3</sub> -rGO                                    | Hydrothermal                     | Nanosheets                  | NF                | 3 M KOH                             | 91 mA h/g                     |                          | [16]      |
| 19.     | NiMnO <sub>3</sub>                                         | Hydrothermal                     | Nanospheres                 | NF                | 3 M KOH                             | 62 mA h/g                     |                          | [16]      |
| 20.     | NiMnO <sub>3</sub>                                         | Hydrothermal                     | Nanosheets                  | Carbon cloth      | 6 M KOH                             | 2330                          | 67.8/1000                | [17]      |
| 21.     | NiMnO <sub>3</sub>                                         |                                  |                             |                   |                                     | 70                            |                          |           |
| 21.     | NiMnO <sub>3</sub> /GO                                     | Co-precipitation                 | Microspheres                | NF                | 0.01 M KOH                          | 170                           | 87/1000                  | [18]      |
| 22.     | NiMnO <sub>3</sub> /rGO                                    |                                  |                             |                   |                                     | 285                           |                          |           |
| 22.     | CT@zn/NMO-rGO                                              | Chemical reduction method        | Nanoplates                  | NF                | 1 M KOH                             | 1404                          | 89.2/30000               | This Work |

**Table S2:** Capacitive performance comparison of some nickel, cobalt, manganese based metal oxides and NF based electrodes.

## References

- [1] V. Jose, V. Jose, E. Kuruvilla, M. Arunkumar, A. Segar Deepi, G. Srikesh, A. Samson Nesaraj, Facile chemical synthesis of Mg-doped NiMnO<sub>3</sub> perovskite based nanostructured materials: Application in photocatalysis and supercapacitors, *Inorganic Chemistry Communications*. 156 (2023) 111205. <https://doi.org/10.1016/j.inoche.2023.111205>.
- [2] K.S. Ranjith, S.M. Ghoreishian, N.R. Chodankar, G.S.R. Raju, S.J. Patil, Y.S. Huh, Y.K. Han, Hierarchical layer to layer of ternary heterostructure: Nanograin nickel carbonate embedded layered NiMnO<sub>3</sub>-rGO-Co<sub>3</sub>O<sub>4</sub> composite array as a high-performance electrode for hybrid supercapacitors, *International Journal of Energy Research*. 46 (2022) 15066–15080. <https://doi.org/10.1002/er.8206>.
- [3] S.D. Dhas, P.S. Maldar, M.D. Patil, K.M. Hubali, U. V. Shembade, S.B. Abitkar, M.R. Waikar, R.G. Sonkawade, G.L. Agawane, A. V. Moholkar, Hydrothermal synthesis of mesoporous NiMnO<sub>3</sub> nanostructures for supercapacitor application: Effect of electrolyte, *Journal of Energy Storage*. 35 (2021) 102277. <https://doi.org/10.1016/j.est.2021.102277>.
- [4] H. Kim, J. Shin, I. Jang, Y. Ju, Perovskite NiMnO<sub>3</sub> Oxide and Application in Supercapacitor Electrode, *Energies*. (2019).
- [5] S. Qiao, N. Huang, J. Zhang, Y. Zhang, Y. Sun, Z. Gao, Microwave - assisted synthesis of Fe - doped NiMnO<sub>3</sub> as electrode material for high - performance supercapacitors, (2024) 1–12.
- [6] M. Dinesh, Y. Haldorai, R.T. Rajendra Kumar, Mn–Ni binary metal oxide for high-performance supercapacitor and electro-catalyst for oxygen evolution reaction, *Ceramics*

- International. 46 (2020) 28006–28012. <https://doi.org/10.1016/j.ceramint.2020.07.295>.
- [7] S. Qiao, N. Huang, Y. Sun, J. Zhang, Y. Zhang, Z. Gao, Microwave-assisted synthesis of novel 3D flower-like NiMnO<sub>3</sub> nanoballs as electrode material for high-performance supercapacitors, *Journal of Alloys and Compounds*. 775 (2019) 1109–1116. <https://doi.org/10.1016/j.jallcom.2018.10.216>.
- [8] D. Tian, X. Lu, G. Nie, M. Gao, C. Wang, Direct growth of Ni-Mn-O nanosheets on flexible electrospun carbon nanofibers for high performance supercapacitor applications, *Inorganic Chemistry Frontiers*. 5 (2018) 635–642. <https://doi.org/10.1039/c7qi00696a>.
- [9] S. Giri, D. Ghosh, C.K. Das, One pot synthesis of ilmenite-type NiMnO<sub>3</sub>-"nitrogen-doped" graphene nanocomposite as next generation supercapacitors, *Dalton Transactions*. 42 (2013) 14361–14364. <https://doi.org/10.1039/c3dt51807h>.
- [10] S.R. Ghorbani, H. Arabi, R. Ghanbari, NiMnO<sub>3</sub> rGO nanocomposites in a cotton - based flexible yarn supercapacitor, (2024) 1–19.
- [11] S. Qiao, S. Zhou, N. Huang, J. Zhang, Y. Sun, L. Yang, X. Du, Novel Ni<sub>6</sub>MnO<sub>8</sub>/ NiMnO<sub>3</sub> composite as a highly stable electrode material for supercapacitors, *Materials Letters*. 255 (2019) 126509. <https://doi.org/10.1016/j.matlet.2019.126509>.
- [12] S. Qiao, N. Huang, Y. Zhang, J. Zhang, Z. Gao, S. Zhou, One-step synthesis of nanoblocks@nanoballs NiMnO<sub>3</sub>/Ni<sub>6</sub>MnO<sub>8</sub> nanocomposites as electrode material for supercapacitors, *International Journal of Hydrogen Energy*. 44 (2019) 18351–18359. <https://doi.org/10.1016/j.ijhydene.2019.05.108>.
- [13] A. Thomas, A. Kumar, G. Perumal, R.K. Sharma, V. Manivasagam, K. Popat, A.

- Ayyagari, A. Yu, S. Tripathi, E. Buck, B. Gwalani, M. Bhogra, H.S. Arora, Oxygen-Vacancy Abundant Nanoporous Ni/ NiMnO<sub>3</sub>/MnO<sub>2</sub>@NiMn Electrodes with Ultrahigh Capacitance and Energy Density for Supercapacitors, *ACS Applied Materials and Interfaces*. 15 (2023) 5086–5098. <https://doi.org/10.1021/acsami.2c16818>.
- [14] Y. Chen, L.T. Cao, P. Lian, J.H. Guan, Y. Liu, Preparation and electrochemical properties of NiMnO<sub>3</sub>@NiO nanosheets for pseudocapacitors, *Journal of Alloys and Compounds*. 832 (2020) 154936. <https://doi.org/10.1016/j.jallcom.2020.154936>.
- [15] S. Karmakar, D. Behera, Small polaron hopping conduction in NiMnO<sub>3</sub>/NiMn<sub>2</sub>O<sub>4</sub> nanocotton and its emerging energy application with MWCNT, *Ceramics International*. 45 (2019) 13052–13066. <https://doi.org/10.1016/j.ceramint.2019.03.237>.
- [16] J.S. Sanchez, A. Pendashteh, J. Palma, M. Anderson, R. Marcilla, Synthesis and application of NiMnO<sub>3</sub>-rGO nanocomposites as electrode materials for hybrid energy storage devices, *Applied Surface Science*. 460 (2018) 74–83. <https://doi.org/10.1016/j.apsusc.2018.02.165>.
- [17] F. Mu, J. Zhao, C. Gu, Ultrathin porous NiMnO<sub>3</sub> nanosheets on carbon cloth for use as supercapacitor electrode, *AIP Advances*. 10 (2020). <https://doi.org/10.1063/5.0009246>.
- [18] X. Jiao, X. Xia, G. Zhang, M. Kong, H. Chauhan, M.K. Singh, Synthesis of NiMnO<sub>3</sub>/C nano-composite electrode materials for electrochemical capacitors, (n.d.).
